# egKnock: identifying direct gene knockout strategies for microbial strain optimization based on metabolic network with gene-protein-reaction relationships

Zixiang Xu<sup>12\*</sup>

1 Key laboratory of systems microbial biotechnology, Tianjin Institute of Industrial Biotechnology, Chinese Academy of Sciences, 32 Xi Qi Dao, Tianjin Airport Economic Area, Tianjin 300308, China.

2 National Engineering Laboratory for Industrial Enzymes and Tianjin Engineering Center for Biocatalytic Technology, Tianjin Institute of Industrial Biotechnology, Chinese Academy of Sciences, 32 Xi Qi Dao, Tianjin Airport Economic Area, Tianjin 300308, China.

Email: ZX(xzx21c@163.com)

\* To whom correspondence should be addressed.

## Abstract

**Background :** Gene knockout method has been used to improve the conversion ratio of industrial strains for many chemical products. There are a series of published algorithms to predict the targets for deletion. Based on metabolic networks, many of these algorithms are designed to predict the target of reaction or enzyme deletion. But as for the many-to-many relationship between genes and reactions, reaction or enzyme deletion is not the ideal strategy for metabolic engineering. GDLS algorithm aims to find direct gene deletion target by using local search, but it actually ignores the logic relationship of gene-protein-reaction.

**Results :** In this study, we aim to find direct gene deletion targets for metabolic network, but the logic relationship of gene-protein-reaction (GPR) is considered. Our algorithm is call egKnock. At the same time, egKnock will provide the solution with multiple strategies and can maximize the minimum target flux of industrial objective in flux variability analysis. We compare egKnock with the algorithm of GDLS and OptORF by predicting the targets of gene deletion for several chemical products with their flux balance analysis testification, flux variability analysis testification and the main flux distribution.

**Conclusions :** By comparison with the algorithm of GDLS and OptORF, we can conclude that egKnock is a nice algorithm for identifying direct gene knockout strategies for microbial strain optimization.

## Keywords

Gene knockout, Systems biology, Synthetic biology, Flux balance analysis, Metabolic network, Metabolic engineering, Yield improvement, Mixed integer bilevel linear programming

## Background

DNA recombinant and other techniques make it possible to manipulate genetic changes,

and gene knockout is one of the methods used to improve the yields of industrial strains for many chemical products. There are a series of published algorithms to predict the targets for deletion [1-6]. Bilevel optimization, which was introduced first time by OptKnock [1], is the core of these algorithms. Based on metabolic networks, many of these algorithms are designed to predict the target of reaction or enzyme deletion, such as OptKnock, ReacKnock [2]. ReacKnock has improved the solving speed and can provide multiple solutions. RobustKnock [3] utilizes triple level optimization method to provide the solution for maximizing the minimum target flux of industrial objective in FVA (flux variability analysis). Of course, as for the many-to-many relationship between gene and reaction, reaction or enzyme deletion is not the ideal strategy for metabolic engineering. GDLS [4] algorithm aims to find direct gene deletion target by using local search, but it actually ignores the logic relationship of gene-protein-reaction (GPR), i.e. it removes all the reactions which a deleted gene concerns. OptORF [5] and OptFlux [6] also aim to find direct gene deletion target, but they are based on metabolic-regulatory integrated network, while this kind of models is actually seldom, and up-to-date only *E.coli* and *Yeast* have the corresponding models [13-15]. Ref [11] reports a modified OptORF without regulatory considerations and it is similar with GDLS in methodology.

In this study, we aim to find direct gene deletion targets for metabolic network, but the logic relationships of gene-protein-reaction (GPR) in metabolic network model are considered. Our algorithm is call egKnock (enzyme gene knockout). At the same time, egKnock will provide the solution with multiple strategies and can maximize the minimum target flux of industrial objective in FVA, while the second function is not included in GDLS, OptFlux and OptORF. The logic relationship of GPR is a tough problem, we firstly transform the model of metabolic network with its GPR relationship to a MILP (mixed integer bilevel linear programming) model by a published Matlab toolbox, named Tiger [7]. Then we utilize an improved bilevel optimization method to make a prediction on the direct gene targets for deletion, while maximizing the minimum target flux of industrial objective in FVA. **Table 1** has shown the comparison among these algorithms about gene deletion prediction.

**Table 1.** Comparison among several algorithms about gene deletion prediction

| Algorithm            | Cell Model         | GPR relationship | Maximize min FVA | multiple solutions |
|----------------------|--------------------|------------------|------------------|--------------------|
| OptKnock             | metabolic network  | no               | no               | no                 |
| ReacKnock            | metabolic network  | no               | no               | yes                |
| RobustKnock          | metabolic network  | no               | yes              | no                 |
| GDLS                 | metabolic network  | no               | no               | yes                |
| egKnock (this study) | metabolic network  | <b>yes</b>       | <b>yes</b>       | <b>yes</b>         |
| OptORF               | integrated network | yes              | no               | yes                |
| OptFlux              | integrated network | yes              | no               | yes                |

## Methods

### 1) Flux balance analysis and gene-protein-reaction relationship

Flux balance analysis is linear programming (LP) in mathematics, and the objective is usually cell growth, while the constraints are stoichiometric balance constraint and flux boundary constraint. Gene-protein-reaction relationships are logic expressions and it is not convenient to

solve a LP with logic expressions as constraints, such as problem (I).

$$\begin{aligned}
 & \max_{v,g,p,r} v_{\text{gro}} = c_1 \cdot v \\
 & \text{s.t.} \\
 & \left\{ \begin{array}{l}
 S \cdot v = 0 \\
 \alpha \leq v \leq \beta \\
 \text{Gene-Protein-Reaction logic constraints } (g, p, r) \\
 \text{Reaction enzyme state logic constraints } (r, v) \\
 v \in \mathbb{R}^n; g, p, r \in (0, 1)
 \end{array} \right. \quad \text{(I)}
 \end{aligned}$$

$v$  representing fluxes through reactions,  $g$  representing the Boolean expression state of all genes,  $p$  representing the presence of each protein,  $r$  representing the presence of a catalyzing enzyme for each reaction,  $S$  is the stoichiometric matrix,  $\alpha$  and  $\beta$  represent lower and upper bounds on the fluxes of reaction rates. Reaction enzyme state logic constraints are like: if  $r_i=1$ ,  $\alpha_i \leq v_i \leq \beta_i$ ; if  $r_i=0$ ,  $v_i=0$ .

## 2) FBA (flux balance analysis) model with GPR

We transform problem (I) where GPRs are logic expressions to the problem (II) where GPRs are inequalities. The logic expressions of GPR relationships include three types “AND, OR, NOT”, and they can be rewritten as linear inequalities [8]. The transforming now can be carried out conveniently by a tool, named Tiger [7].

$$\begin{aligned}
 & \max_{v,g,p,r} v_{\text{gro}} = c_1 \cdot v \\
 & \text{s.t.} \\
 & \left\{ \begin{array}{l}
 S \cdot v = 0 \\
 \alpha \leq v \leq \beta \\
 \text{Gene-Protein-Reaction inequality constraints } (g, p, r, s) \\
 \text{Reaction enzyme state inequality constraints } (r, v) \\
 v \in \mathbb{R}^n; g, p, r, s \in (0, 1); s \text{ is auxiliary variables}
 \end{array} \right. \quad \text{(II)}
 \end{aligned}$$

Reaction enzyme state inequality constraints are like:  $r_i \alpha_i \leq v_i \leq r_i \beta_i$ .

## 3) Bilevel optimization model with GPR

In order to maximize the rate of product flux, bilevel optimization method can be utilized. The first level is to maximize bioengineering objective, while the second level is to maximize biomass objective. The GPR inequalities and the control constraints are put at the first level. The scale limit of deletion is also in the first level.

$$\begin{aligned}
 & \text{First Level: maximize bioengineering objective} \quad \max_{y,g,p,r,s} f_1 = c_2 \cdot v \\
 & \text{s.t.} \quad \text{limit1} \leq \sum y_i \leq \text{limit2}, y_i \text{ is } \{0,1\} \\
 & \quad \text{Gene-Protein-Reaction inequality constraints } (g, p, r, s) \\
 & \quad \text{Control constraints } (y, g) \\
 & \quad g, p, r, s \in (0, 1); s \text{ is auxiliary variables}
 \end{aligned}$$

$$\text{Second Level: maximize biomass objective } \max_v f_2 = c_1 \cdot v \quad (\text{III})$$

s.t.

$$\begin{cases} S \cdot v = 0 \\ \alpha \leq v \leq \beta \\ \text{Reaction enzyme state inequality constraints } (r, v) \\ v \in \mathbb{R}^n \end{cases}$$

Here,  $f_1$  is the objective function to maximize industrial production,  $f_2$  is the objective function for the cell to maximize the growth, i.e.  $v_{gro}$ ;  $y$  is the control variable,  $y(i)=0$  means the gene should be deleted. Control constraints are like:  $y_i = g_i$ .

#### 4) Maximizing the minimum target flux of industrial objective in FVA

But the gene deletion strategies from the solution of problem (III) only provide the possibility of obtaining a higher yield of product, do not guarantee to maximize the minimum target flux of industrial objective in FVA. In order to make the product flux predicted by egKnock can keep consistent with the minimum target flux in FVA and FBA testification, we change the second level optimization of problem (III) to be minimizing bioengineering objective but under the condition of the same growth, so another set of variables  $v'$  and  $r'$  are introduced. The method we used here is different from RobustKnock [3] which utilizes triple level optimization method.

$$\text{First Level: maximize bioengineering objective } \max_{y,g,p,r,s} f_1 = c_2 \cdot v$$

$$\text{s.t. } \text{limit1} \leq \sum y_i \leq \text{limit2}, y_i \text{ is } \{0,1\}$$

Gene-Protein-Reaction inequality constraints ( $g, p, r, s$ )

Control constraints ( $y, g$ )

$g, p, r, s \in (0, 1)$ ;  $s$  is auxiliary variables

$$\text{Second Level: minimize bioengineering objective } \min_v f_1 = c_2 \cdot v' \quad (\text{IV})$$

s.t.

$$\begin{cases} S \cdot v = 0, S \cdot v' = 0 \\ \alpha \leq v \leq \beta, \alpha \leq v' \leq \beta \\ \text{Reaction enzyme state inequality constraints } (r, v) \text{ and } (r', v') \\ c_1 \cdot v = c_1 \cdot v' \\ v, v' \in \mathbb{R}^n \end{cases}$$

$v'$  represents fluxes through reactions and it is an equivalent variable of  $v$ ;  $r'$  represents the presence of a catalyzing enzyme for each reaction and it is an equivalent variable of  $r$ ; The objective function of the second level is to minimize bioengineering objective, and the objective function of the first level is to maximize minimized bioengineering objective.

#### 5) Transforming bilevel optimization to single level optimization

The above bilevel optimization (IV) can be transformed to a single level MILP (V), and the method utilized is Karush-Kuhn-Tucker (KKT) method, which has been introduced in Ref [2].



COBRA Toolbox to remove the predicted target genes and related reactions from the original model. Secondly, egKnock can find direct gene deletion targets for metabolic network, while the logic relationship of GPR is considered. But GDLS actually ignores the logic relationship of GPR, i.e. it removes all the reactions which a gene concerns and this gene is regarded as a deletion target. From the formula (4) of GDLS paper in the Method section, the GPR relationship of metabolic model is reflected in matrix  $G$ , but matrix  $G$  actually does not include the logic relationships of GPR. That is to say “AND, OR, NOT” logic relationships cannot be reflected in matrix  $G$ . OptORF without regulatory considerations [11] is similar to GDLS in methodology. Thirdly, egKnock can return all the alternative deletion strategies in the same search scope with the near industrial objective, while OptORF only provides one deletion strategy for a given deletion number. Fourthly, egKnock adopted numerical method by transforming bilevel optimization to mixed integer program (MIP) and solves MIP by optimization software such as Gurobi [16] or Cplex. Meta-heuristics is another way to solve bilevel optimization [17], where it transforms bilevel optimization to nonlinear program with joint objective and solves it by evolutionary algorithm. OptGene utilizes genetic algorithm to bilevel optimization [18]. Both [17] and [18] are only for metabolic model without considering GRP relationships. In general, numerical methods are faster than heuristics method or genetic algorithms. OptFlux adopts heuristics method as well, so it will spend a long time to reach the optimal point. Fifthly, as we said in Introduction, the model of metabolic-regulatory integrated network is better in describing the behavior of cell than metabolic network model, but this kind of models is actually seldom at present. OptFlux and OptORF are towards integrated network model, but OptORF did not provide the computational tool.

In order to see how the output fluxes are guided to the product after gene deletion, we choose Acetate as an example. We draw respectively the main flux distribution of wild-type *E.coli* and the main flux distribution of mutant *E.coli* with deleting the 15 genes predicted by egKnock for producing Acetate. The flux distribution was calculated with *E.coli*\_iAF1260, and when calculating the flux distribution of the mutant, those 15 genes were removed from the model. Of course, the flux distribution of both wild-type *E.coli* and the mutant are complex and we are unable to draw them in one picture clearly at a glance, so we just draw the main flux distribution. The main fluxes mean that the absolute flux values of the reactions in the metabolic network are larger than a given value, such as 5 or 10 mmol/g(Dw)h, then we will draw just several tens of reaction fluxes in one picture. The main flux distribution of wild-type *E.coli* and the mutant are illustrated in **Figure 1** and **Figure 2** respectively, drawn by Paint4Net [12], a COBRA Toolbox extension for visualization of stoichiometric models of metabolism. From the figure, we can see that the flux distribution of mutant *E.coli* is more complex than that of wild-type, but the output fluxes are guided to Acetate. CO<sub>2</sub> was the main output flux of wild-type *E.coli* and it was a primary C loss, while this is reduced greatly in the mutant.

## Conclusions

There are several merits of egKnock over GDLS and OptORF. 1) egKnock can guarantee to maximize the minimum target flux of industrial objective in FVA. If a predicted gene deletion strategy which can't guarantee to maximize the minimum target flux of industrial objective in FVA and this actually just provides the possibility to get a high yield of product, this strategy will

actually be an ineffective strategy and we should necessarily design the metabolic pathway in the later. 2) egKnock can find direct gene deletion targets for metabolic network, while the logic relationship of GPR is considered. 3) egKnock can provide all the alternative deletion strategies in the same deletion number and near theoretical yields. It's very useful for multiple deletion strategies in strain design, for it can provide alternative gene operation strategies. 4) egKnock is stable in running. OptORF is instable in the cases of Formate production, and it can't provide effective deletion strategies for the chemical productions.

## List of abbreviations

GPR (gene-protein-reaction), FVA (flux variability analysis), egKnock (enzyme gene knockout) MILP (mixed integer bilevel linear programming), linear programming (LP), Karush-Kuhn-Tucker (KKT), FBA (flux balance analysis)

## Declarations

### Availability of data and materials

- 1) The genome-scale metabolic network model of *E. coli*, named iAF1260, could be found in Ref. [9].
- 2) Supplementary information: including **Table S1** and **Table S2**.
- 3) The Matlab code of egKnock algorithm, the rewritten Matlab code of GDLS and OptORF algorithms could be obtained by the requirement.

### Funding

Support for this work was provided by “National Natural Science Foundation of China (31370829)”, “Tianjin Research Program of Application Foundation and Advanced Technology (15JCYBJC23600)”. The funders had no role in study design, data collection and analysis, decision to publish, or preparation of the manuscript.

### Competing interests

The authors declare no competing financial interests.

### Authors' contributions

Conceived and designed the experiments: ZX. Performed the experiments: ZX. Analyzed the data: ZX. Contributed reagents/materials/analysis tools: ZX. Wrote the paper: ZX.

## References

- [1] Burgard, AP et al. OptKnock: A bilevel programming framework for identifying gene knockout strategies for microbial strain optimization. *Biotechnology and Bioengineering*. 2003, 84(6): 647-657.
- [2] Xu Zixiang, Zheng Ping, Sun Jibin, Ma Yanhe. ReactKnock: Identifying Reaction Deletion Strategies for Microbial Strain Optimization Based on Genome-Scale Metabolic Network. *PLoS One*. 2013, 8(12).

- [3] Tepper, N. and T. Shlomi. Predicting metabolic engineering knockout strategies for chemical production: accounting for competing pathways. *Bioinformatics*. 2010, 26(4): 536-543.
- [4] Lun, D. S., G. Rockwell, et al. Large-scale identification of genetic design strategies using local search. *Molecular Systems Biology*. 2009, 5:296.
- [5] Kim, J., Reed, J.. OptORF: optimal metabolic and regulatory perturbations for metabolic engineering of microbial strains. *BMC Systems Biology*. 2010, 4 (1), 53.
- [6] Rocha, I., Maia, P., Evangelista, P., Vilac, a, P., Soares, S., Pinto, J., et al.. OptFlux: an open-source software platform for in silico metabolic engineering. *BMC Systems Biology*. 2010, 4: 45.
- [7] Paul A Jensen, Kyla A Lutz, Jason A Papin. TIGER: Toolbox for integrating genome-scale metabolic models, expression data, and transcriptional regulatory networks. *BMC Systems Biology*. 2011, 5:147.
- [8] Shlomi, T., Eisenberg, Y., Sharan, R., Ruppin, E.. A genome-scale computational study of the interplay between transcriptional regulation and metabolism. *Molecular Systems Biology*. 2007, 3: 101.
- [9] Feist AM, Henry CS, Reed JL, Krummenacker M, Joyce AR, et al. A genome-scale metabolic reconstruction for Escherichia coli K-12 MG1655 that accounts for 1260 ORFs and thermodynamic information. *Molecular Systems Biology*. 2007, 3: Art. No. 121.
- [10] Becker SA, Feist AM, Mo ML, Hannum G, Palsson BØ, et al. Quantitative prediction of cellular metabolism with constraint-based models: the COBRA Toolbox. *Nature protocols*. 2007, 2: 727–738.
- [11] Joonhoon Kim, Jennifer L. Reed, Christos T. Maravelias. Large-Scale Bi-Level Strain Design Approaches and Mixed-Integer Programming Solution Techniques. *PLoS ONE*. 2011, 6(9): e24162.
- [12] Andrejs Kostromins, Egils Stalidzans. Paint4Net: COBRA Toolbox extension for visualization of stoichiometric models of metabolism. *BioSystems*. 2012, 109:233-239.
- [13] MW Covert, EM Knight, JL Reed, MJ Herrgard, BO Palsson. Integrating high-throughput and computational data elucidates bacterial networks. *Nature*. 2004 , 429 (6987) :92-6.
- [14] JL Reed, BO Palsson. The Global Transcriptional Regulatory Network for Metabolism in Escherichia coli Exhibits Few Dominant Functional States. *Proceedings of the National Academy of Sciences of the United States of America*. 2005 , 102 (52) :19103-8.
- [15] JL Hjersted, MA Henson. Steady-state and dynamic flux balance analysis of ethanol production by *Saccharomyces cerevisiae*. *IET Systems Biology*. 2009 , 3 (3) :167-179.
- [16] Gurobi: <http://www.gurobi.com/>
- [17] Miguel Rocha, et al.. Natural computation meta-heuristics for the in silico optimization of microbial strains. *BMC Bioinformatics*. 2008, 9:499.
- [18] Pharkya P, Maranas CD. An optimization framework for identifying reaction activation/inhibition or elimination candidates for overproduction in microbial systems. *Metabolic Engineering*. 2006, 8: 1–13.

**Table 2.** Comparison of the predictions by egKnock, OptORF, GDLS. The following constraints were applied: glucose consumption rate is 10, cell growth is no less than 0.1, maintenance energy metabolism is 8.39, oxygen consumption rate is no higher than 18.5. All the rate unit is mmol/g(Dw)h. Max\_yield means the maximum conversion ratio at the given condition. The maximum computation time was set to 60 min, but the time consumption of most cases are within the set.

| Chemical target | Strain type | Prod. rate | Growth rate | FVA test min / max Prod. rate | FBA test Growth rate | FBA test Prod. rate | Enzyme genes to be deleted as example                                                                                         |
|-----------------|-------------|------------|-------------|-------------------------------|----------------------|---------------------|-------------------------------------------------------------------------------------------------------------------------------|
| Acetate         | (Max_Yield) | 25.69      |             |                               |                      |                     |                                                                                                                               |
|                 | Wild_type   | 1.68       | 0.885       | 1.68 / 1.68                   | --                   | --                  | --                                                                                                                            |
|                 | egKnock     | 23.57      | 0.1         | 23.61 / 23.61                 | 0.1                  | 23.61               | 'b0825' 'b0963' 'b1091' 'b1849' 'b1850'<br>'b2029' 'b2210' 'b2913' 'b2943' 'b3236'<br>'b3708' 'b3736' 'b3919' 'b3946' 'b4015' |
|                 | OptORF      | 23.46      | 0.11        | 8.62 / 23.46                  | 0.11                 | 8.62                | 'b1850' 'b2210' 'b2500' 'b2913' 'b3236'<br>'b3731' 'b3732' 'b3733' 'b3734' 'b3735'<br>'b3736' 'b3737' 'b3738' 'b3739' 'b3919' |
|                 | GDLS        | 23.62      | 0.1         | 8.3 / 8.3                     | 0.62                 | 8.3                 | 'b0116' 'b0351' 'b0721' 'b0767' 'b2416'<br>'b2501' 'b2925' 'b2943' 'b2976' 'b3236'<br>'b3617' 'b3708' 'b3946' 'b4321' 'b4388' |
| Formate         | (Max_Yield) | 43.69      |             |                               |                      |                     |                                                                                                                               |
|                 | Wild_type   | 0.0021     | 0.885       | 0.00223 / 0                   | --                   | --                  | --                                                                                                                            |
|                 | egKnock     | 28.65      | 0.1         | 28.67 / 28.67                 | 0.1                  | 28.67               | 'b0114' 'b0124' 'b0430' 'b0822' 'b0837'<br>'b0963' 'b1702' 'b1779' 'b1849' 'b2388'<br>'b2508' 'b2913' 'b2914' 'b3565' 'b4090' |
|                 | OptORF      | 0.002      | 0.885       | 0 / 17.53                     | 0.31                 | 0                   | 'b0237' 'b0411' 'b0825' 'b1243' 'b2407'<br>'b2416' 'b3449' 'b3731' 'b3732' 'b3734'<br>'b3735' 'b3946' 'b4069' 'b4382' 'b4384' |

|           |             |       |       |               |       |         |         |         |         |         |         |
|-----------|-------------|-------|-------|---------------|-------|---------|---------|---------|---------|---------|---------|
| Glycolate | GDLS        | 30    | 0.1   | 6.63 / 18.38  | 0.26  | 6.63    | 'b0576' | 'b0727' | 'b1602' | 'b1849' | 'b2029' |
|           |             |       |       |               |       |         | 'b2441' | 'b2508' | 'b2976' | 'b3290' | 'b3380' |
|           |             |       |       |               |       |         | 'b3517' | 'b3588' | 'b3735' | 'b3835' | 'b4388' |
|           | (Max_Yield) | 25.69 |       |               |       |         |         |         |         |         |         |
|           | Wild_type   | 0     | 0.885 | 0.000039 / 0  | --    | --      | --      |         |         |         |         |
| Glycolate | egKnock     | 7.06  | 0.1   | 8.49 / 8.49   | 0.12  | 8.49    | 'b0507' | 'b0727' | 'b0902' | 'b1232' | 'b1302' |
|           |             |       |       |               |       |         | 'b1603' | 'b1852' | 'b2500' | 'b2587' | 'b2662' |
|           |             |       |       |               |       |         | 'b2914' | 'b2976' | 'b3236' | 'b3588' | 'b3708' |
|           |             |       |       |               |       |         | 'b3951' | 'b4014' | 'b4090' | 'b4266' | 'b4388' |
|           | OptORF      | 22.52 | 0.179 | 0 / 21.77     | 0.154 | 0       | 'b0116' | 'b0507' | 'b0726' | 'b0727' | 'b0825' |
| Glycolate |             |       |       |               |       |         | 'b0963' | 'b1302' | 'b1676' | 'b1850' | 'b1854' |
|           |             |       |       |               |       |         | 'b2029' | 'b2463' | 'b2662' | 'b2913' | 'b2976' |
|           |             |       |       |               |       |         | 'b3708' | 'b3919' | 'b3946' | 'b4014' | 'b4025' |
|           | GDLS        | 23.27 | 0.12  | 0 / 0         | 0.61  | 0       | 'b0116' | 'b0507' | 'b0521' | 'b0767' | 'b0871' |
|           |             |       |       |               |       |         | 'b1245' | 'b1444' | 'b2133' | 'b2943' | 'b2976' |
| D-Lactate |             |       |       |               |       |         | 'b2987' | 'b3517' | 'b3708' | 'b3835' | 'b3892' |
|           |             |       |       |               |       |         | 'b3919' | 'b3946' | 'b4266' | 'b4268' | 'b4388' |
|           | (Max_Yield) | 18.56 |       |               |       |         |         |         |         |         |         |
|           | Wild_type   | 0     | 0.885 | 0.000019 / 0  | --    | --      | --      |         |         |         |         |
|           | egKnock     | 17.73 | 0.1   | 17.76 / 17.76 | 0.1   | 17.76   | 'b0114' | 'b0430' | 'b0677' | 'b0733' | 'b0767' |
| D-Lactate |             |       |       |               |       |         | 'b0904' | 'b0979' | 'b1207' | 'b1247' | 'b1302' |
|           |             |       |       |               |       |         | 'b1603' | 'b1852' | 'b2407' | 'b2492' | 'b2662' |
|           |             |       |       |               |       |         | 'b2866' | 'b3236' | 'b4208' | 'b4382' | 'b4384' |
|           | OptORF      | 17.85 | 0.13  | 0 / 17.8      | 0.13  | 0       | 'b0221' | 'b2210' | 'b2281' | 'b2297' | 'b2458' |
|           |             |       |       |               |       |         | 'b2914' | 'b2997' | 'b3006' | 'b3212' | 'b3236' |
|           |             |       |       |               |       | 'b3731' | 'b3732' | 'b3733' | 'b3734' | 'b3735' |         |

|          |             |       |       |               |       |         |         |         |         |         |         |
|----------|-------------|-------|-------|---------------|-------|---------|---------|---------|---------|---------|---------|
|          |             |       |       |               |       | 'b3736' | 'b3737' | 'b3738' | 'b3739' | 'b3835' |         |
|          | GDLS        | 18.55 | 0.1   | 0 / 0         | 0.455 | 0       | 'b0114' | 'b0351' | 'b0430' | 'b0733' | 'b0888' |
|          |             |       |       |               |       |         | 'b1109' | 'b1761' | 'b2210' | 'b2243' | 'b2288' |
|          |             |       |       |               |       |         | 'b2406' | 'b2407' | 'b2501' | 'b3028' | 'b3290' |
|          |             |       |       |               |       |         | 'b3553' | 'b3708' | 'b3844' | 'b3892' | 'b3952' |
| Fumarate | (Max_Yield) | 16.08 |       |               |       |         |         |         |         |         |         |
|          | Wild_type   | 0     | 0.885 | 0.0000082 / 0 | --    | --      | --      |         |         |         |         |
|          | egKnock     | 10.07 | 0.1   | 10.27 / 10.27 | 0.1   | 10.27   | 'b0124' | 'b0394' | 'b0674' | 'b0767' | 'b0825' |
|          |             |       |       |               |       |         | 'b0837' | 'b1611' | 'b1612' | 'b1723' | 'b2287' |
|          |             |       |       |               |       |         | 'b2297' | 'b2407' | 'b2458' | 'b2501' | 'b2913' |
|          |             |       |       |               |       |         | 'b3588' | 'b3916' | 'b3946' | 'b4122' | 'b4384' |
|          | OptORF      | 10.62 | 0.25  | 7.45 / 10.62  | 0.25  | 7.45    | 'b0394' | 'b0767' | 'b0825' | 'b0904' | 'b1611' |
|          |             |       |       |               |       |         | 'b1612' | 'b1773' | 'b1852' | 'b1900' | 'b2097' |
|          |             |       |       |               |       |         | 'b2492' | 'b2889' | 'b2925' | 'b3386' | 'b3415' |
|          |             |       |       |               |       |         | 'b3946' | 'b4122' | 'b4265' | 'b4321' | 'b4476' |
|          | GDLS        | 11.98 | 0.12  | 0 / 0         | 0.72  | 0       | 'b0033' | 'b0521' | 'b0576' | 'b0767' | 'b1602' |
|          |             |       |       |               |       |         | 'b1611' | 'b1761' | 'b1850' | 'b2508' | 'b2744' |
|          |             |       |       |               |       |         | 'b2905' | 'b2987' | 'b3290' | 'b3588' | 'b3708' |
|          |             |       |       |               |       |         | 'b3916' | 'b3946' | 'b3952' | 'b4265' | 'b4388' |

**Table 3.** First ten alternative solutions provided by egnock for predicting 20-gene deletions to produce succinate on the model *E. coli*\_iAF1260 under aerobic condition with glucose Input = -10 mmol/g(Dw)h. The last two lines are growth rate and product rate respectively.

| No.                 | 1       | 2       | 3       | 4       | 5       | 6       |
|---------------------|---------|---------|---------|---------|---------|---------|
| Deletion Strategies | 'b0242' | 'b0008' | 'b0124' | 'b0394' | 'b0124' | 'b0124' |
|                     | 'b0767' | 'b0112' | 'b0469' | 'b0722' | 'b0323' | 'b0688' |
|                     | 'b0904' | 'b0337' | 'b0722' | 'b0767' | 'b0474' | 'b0724' |
|                     | 'b1199' | 'b0902' | 'b0767' | 'b0825' | 'b0521' | 'b0751' |
|                     | 'b1676' | 'b1199' | 'b0825' | 'b1603' | 'b0529' | 'b0825' |
|                     | 'b1761' | 'b1207' | 'b0837' | 'b1723' | 'b0723' | 'b0837' |
|                     | 'b1854' | 'b1676' | 'b0910' | 'b1849' | 'b0767' | 'b0910' |
|                     | 'b2297' | 'b1761' | 'b1602' | 'b2297' | 'b0825' | 'b1207' |
|                     | 'b2407' | 'b1854' | 'b1723' | 'b2388' | 'b0837' | 'b1603' |
|                     | 'b2436' | 'b2297' | 'b2297' | 'b2407' | 'b1603' | 'b1723' |
|                     | 'b2458' | 'b2407' | 'b2458' | 'b2458' | 'b1723' | 'b1852' |
|                     | 'b2492' | 'b2436' | 'b2500' | 'b2501' | 'b2297' | 'b2297' |
|                     | 'b2501' | 'b2458' | 'b2661' | 'b2913' | 'b2458' | 'b2458' |
|                     | 'b2551' | 'b2464' | 'b2744' | 'b3437' | 'b2501' | 'b2500' |
|                     | 'b2987' | 'b2744' | 'b2913' | 'b3588' | 'b2661' | 'b2661' |
|                     | 'b3386' | 'b3708' | 'b3588' | 'b3916' | 'b2874' | 'b2690' |
|                     | 'b3493' | 'b3738' | 'b3665' | 'b3946' | 'b3588' | 'b3588' |
|                     | 'b3736' | 'b3951' | 'b3916' | 'b4265' | 'b3916' | 'b3916' |
|                     | 'b4301' | 'b4384' | 'b3946' | 'b4268' | 'b3946' | 'b3946' |
|                     | 'b4384' | 'b4388' | 'b4384' | 'b4384' | 'b4388' | 'b4388' |
| growth rate         | 0.1     | 0.1     | 0.1     | 0.1     | 0.1     | 0.1     |
| product rate        | 9.29    | 9.00    | 11.77   | 11.49   | 11.77   | 11.77   |

|             |      |      |       |       |       |       |
|-------------|------|------|-------|-------|-------|-------|
| FBA_growth  | 0.1  | 0.1  | 0.1   | 0.1   | 0.1   | 0.1   |
| FBA_product | 9.29 | 9.01 | 11.78 | 11.77 | 11.78 | 11.78 |
| FVA_min     | 9.29 | 9.00 | 11.78 | 11.77 | 11.78 | 11.78 |
| FVA_max     | 9.29 | 9.01 | 11.78 | 11.77 | 11.78 | 11.78 |
